# 1 The sugarless grape trait characterized by single berry phenotyping

2

3 **Antoine Bigard<sup>1,2</sup>, Charles Romieu<sup>2,3</sup>, Hernán Ojeda<sup>1</sup>, Laurent Torregrosa<sup>1,4\*</sup>**

4

5 <sup>1</sup>UE INRAE de Pech Rouge, 11430, Gruissan, France.

6 <sup>2</sup>AGAP, University of Montpellier, CIRAD, INRAE, Institut Agro, 34060 Montpellier Cedex, France.

7 <sup>3</sup>GENOVIGNE, IFV, INRAE, Institut Agro, 2, place P. Viala, 34060 Montpellier Cedex, France

8 <sup>4</sup>LEPSE, University of Montpellier, CIRAD, INRAE, Institut Agro, 34060 Montpellier Cedex, France.

9

10

11 **\*Corresponding author:** [laurent.torregrosa@supagro.fr](mailto:laurent.torregrosa@supagro.fr)

12

## 13 **Abstract**

14

15 For grape production, an important driver for the selection of varieties better adapted to  
16 climate fluctuations, especially warming, is the balance between fruit sugars and acidity. Since  
17 the past decades, temperature during ripening has constantly raised causing excessive sugars  
18 concentrations and insufficient acidity of the wine grapes in warmest regions. There is thus an  
19 increasing interest in breeding new cultivars, able to ripen at lower sugar concentration while  
20 preserving fruit acidity. However, the phenotyping of berry composition challenges both  
21 methodological and conceptual issues. Indeed, most authors predetermine either average  
22 harvest date, ripening duration, thermal time or even hexoses concentration threshold itself,  
23 to compare accessions at an hopefully similar ripe stage. Here, we have phenotyped the fruit  
24 development and composition of 6 genotypes, including 3 new disease-tolerant varieties  
25 known to produce wines with low alcoholic contents. The study was performed at single berry  
26 level from the end of green growth stage to the arrest of phloem unloading, when water and  
27 solute contents reach a maximum per berry. The results confirmed that sugarless genotypes  
28 achieve fruit ripening with 20-30% less hexoses than classical varieties, Grenache N and Merlot  
29 N, without impacting berry growth, total acidity or cations accumulation. Sugarless genotypes  
30 displayed a higher malic acid/tartaric acid balance than other genotypes with similar  
31 sucrose/H<sup>+</sup> exchanges at the onset of ripening. Data suggest that sugarless phenotype results  
32 from a specific plasticity in the relationship between growth and the turgor imposed by  
33 organic acid accumulation and sugar loading. This opens interesting perspectives to  
34 understand the mechanism of grapevine berry growth and to breed varieties better coping  
35 with climate warming.

36

37 **Key words:** Fleshy fruit, fruit development, ripening, sugars, acidity, climate warming

## 38 **Introduction**

39 With an hexose concentration (glucose + fructose, [Hex]) higher than 1.1 mol.l<sup>-1</sup> at ripe stage,  
40 grape is one of the richest fleshy fruits in sugars. [Hex] is accepted to depend on the GxExM  
41 interaction (Suter et al., 2021) and until recently, cultivars adaptation to local conditions was  
42 essentially reasoned according to the thermal time needed to reach specific vegetative and  
43 reproductive phenological stages, as budburst, flowering or fruit veraison (Parker et al., 2020).  
44 The selection of grapevine varieties is mainly driven by the balance between sugars and acidity  
45 (Torregrosa et al., 2017; Ollat et al., 2018; Duchêne et al., 2020). In cold climates, early ripening  
46 varieties are preferred to secure the accumulation of sugars and secondary metabolites before  
47 autumn. Conversely, in warm regions, late ripening varieties shifting fruit ripening to cooler  
48 days preserve organic acids (Rienth et al., 2016), anthocyanidin (Zhang et al., 2015) and aroma  
49 compounds (Alessandrini et al., 2018; Asproudi et al., 2016; Gutiérrez-Gamboa et al., 2018).  
50 But in practice a range of enological processes are implemented to correct sugars and/or acidity  
51 of the must, demonstrating that the supposed adaptation of the varieties based on thermal time  
52 phenology is oversimplified. Since the past decades, temperature during the period of grapevine  
53 fruit ripening has constantly increased, which may lead to excessive sugars and insufficient  
54 acidity in hot vine growing areas, such as mediterranean regions (Santillan et al., 2019, Bécart  
55 et al., 2022). Especially, with the strength and the rate of ongoing climate changes, it is critical  
56 to better objectify the development and the metabolism of the fruits to characterize their  
57 adaptation potential (Bigard et al., 2018 and 2020). There is thus increased interest in breeding  
58 new cultivars, able to ripen at lower sugar concentration while preserving fruit acidity.

59 Actually, warming doesn't simply accelerate the whole ripening process, which would be easily  
60 solved by harvesting earlier but it decorrelates different aspects of ripening, accelerating malic  
61 acid breakdown (Rienth et al., 2016, Sweetmann et al., 2014) while inhibiting the accumulation  
62 of secondary metabolites such as anthocyanins, hence the decision to shift the date of harvest  
63 to higher [Hex] (Arrizabalaga et al., 2018). Moreover, comparing cultivars at the same  
64 developmental stage (the so-called ripe stage) raises both methodological and conceptual issues.  
65 In most comparative studies, authors predetermine an average harvest date, ripening duration,  
66 thermal time or even [Hex] threshold to compare accessions at an hopefully similar ripe stage,  
67 in contradiction with the recognized impact of GxE on these variables (Liu et al., 2007; Dai et  
68 al., 2011; Duchêne et al., 2012). To circumvent this inconsistency and lack of consensus, the  
69 moment at which berry phloem unloading stops was recently proposed as a relevant definition  
70 of ripe stage both on the physiological and transcriptomic point of views (Bigard et al., 2018

71 and 2020; Shahood et al., 2015 and 2020; Savoi et al., 2021). This key transition which marks  
72 the arrest of the most intensive fruit biochemical pathways is associated with the transcriptional  
73 extinction of many genes encoding, amongst other, sugar transporters, aquaporins and cell wall-  
74 related enzymes (Savoi et al., 2021). Unfortunately, this developmental stage can't be directly  
75 inferred from [Hex] kinetics, which continue to evolve after the completion of sugar storage (or  
76 accumulation) due to subsequent berry shriveling. Thus, additional information on berry growth  
77 is required to address the net rates of sugar accumulation and malic acid breakdown in berries,  
78 together with their respective timings. Very recently, single berry phenotyping approaches  
79 improved our understanding of berry growth and metabolism during ripening, avoiding the  
80 biases due to berry asynchronicity (Shahood et al., 2020; Savoi et al., 2021). According to this  
81 new paradigm, this study aims to decipher the genetic differences existing for [Hex] and fruit  
82 acidity in a set of genotypes encompassing traditional varieties and new hybrids exhibiting low  
83 [Hex] at harvest (Escudier et al., 2017; Ojeda et al., 2017).

84

## 85 **Materials and method**

86 **Plant Material and sampling method** - Experiments were performed outdoors at the INRAE  
87 Pech Rouge experimental unit (Gruissan, France, 43.14'/3.14''W) under a semi-arid  
88 Mediterranean climate in 2017 (temperature, rainfall and evapotranspiration data described  
89 in Alem et al., 2021). Experimental plots were managed through drip irrigation keeping the  
90 predawn leaf water potential ( $\Psi_{PD}$ ) higher than -0.5 MPa (Giorgi & Lionello, 2008) to  
91 correspond to a moderate water stress. The set of the genotypes encompassed 3 traditional  
92 varieties Grenache N, Merlot N, and Morrastel N (<https://plantgrape.plantnet-project.org/fr/>)  
93 and 3 new disease-resistant varieties deriving from 4 (3197-81B, 3197-373N) or 5 (3184-1-9N)  
94 backcrosses of *Muscadinia rotundifolia* with *V. vinifera* varieties (Bouquet al., 1980). These 3  
95 last genotypes are known to display a reduced [Hex] at harvest allowing the production of  
96 wines at low ethanol levels, called VDQA, "**Vins De Qualité à teneur modérée en Alcool**" (Ojeda  
97 et al. 2017). In the rest of the manuscript, the names G5, G7 and G14 will be respectively used  
98 for 3197-81B, 3197-373N and 3184-1-9N. From 2 weeks before the first signs of berry  
99 softening to 2 weeks later and during the rest of the ripening period over 1 week after fruit  
100 shriveling, respectively 60 and 30 berries were weekly and randomly collected. Whole berries  
101 were sampled between 9 and 11 AM by cutting the fruit peduncle just below the calyx,  
102 maintained in a plastic bag in a cool place and analysed in the same day.

103 **Berry firmness and composition** - Firmness was monitored with a digital penetrometer called  
104 Pénélaup™ (Abbal et al., 1992; Robin et al., 1997) as described in Shahood et al. (2020).  
105 Immediately after firmness measurement, berries were immersed in 4 times their weight in  
106 0.25N HCl. Seeds were immediately removed and samples incubated 48h. Samples were  
107 vigorously shaken and a first 100  $\mu\text{L}$  aliquot was 11 times diluted with  $8.3 \cdot 10^{-3}$  N acetic acid  
108 (internal control) +  $16.4 \cdot 10^{-3}$  N sulphuric acid and centrifuged 5 min' at 18,500 g at 20°C,  
109 supernatants were injected for HPLC to quantitate glucose, fructose, malic and tartaric acids  
110 through a Biorad aminex-HPX87H column also described in Shahood et al. (2020). A second  
111 100  $\mu\text{L}$  aliquot was diluted 10 times in water and then 3 min centrifuged at 12000 rpm (20°C).  
112 Ten  $\mu\text{L}$  clear supernatant was then injected in the HPLC through a Waters® IC-Pak Cation M/D  
113 3.9x150 mm column with same parameters used in Bigard et al. (2020) in order to obtain  
114 Potassium ( $[\text{K}^+]$ ), Magnesium ( $[\text{Mg}^{2+}]$ ) and Calcium ( $[\text{Ca}^{2+}]$ ) concentrations. Titratable acidity  
115 (TA) was calculated as the sum of malic and tartaric acids minus  $\text{K}^+$  in  $\text{mEq}\cdot\text{L}^{-1}$ .

116 **Data normalisation and presentations** - R® software (version 4.1.2) was used to build  
117 graphical representations and to analyse the data (R Core Team, 2017). Main packages used  
118 for this study were “ggplot2” (Version 3.3.5), “car” (Version 3.0-12) and “rcompanion”  
119 (Version 2.4.6).

120

## 121 **Results and discussion**

122 The grapevine displays small fruits clustered in grapes presenting a huge internal asynchrony  
123 (Gouthu et al., 2014; Doumouya et al., 2014; Bigard et al., 2019; Shahood et al., 2020), as  
124 illustrated in the next figures. Extrapolating single fruit metabolic traits from the averages  
125 values observed on the population of berries led to biased kinetic interpretations and chimeric  
126 metabolic concepts. In the grapevine where the berry is the only truly relevant physiological  
127 unit, the most accurate method would be to non-destructively characterize each single fruit  
128 kinetics (Castellarin et al., 2015; Savoi et al., 2021), which is only possible for morphological  
129 attributes (fruit color and volume) and firmness. Regarding solute accumulation, hypodermal  
130 sampling led to excessively elevated fluxes possibly resulting from injuring the berries, so its  
131 validity was questioned (Coombe, 1992). Destructive sampling of density sorted berries or  
132 large sets of individual fruits is then required to get accurate physiological insights on  
133 grapevine fruit development (Rolle et al., 2011; Bigard et al., 2019; Shahood et al., 2020). Here,  
134 we phenotyped the ripening of 3 new sugarless genotypes (G5, G7 and G14) and 3 traditional



135 varieties (Grenache N, Merlot N, Morrastel N) though the destructive chemical analysis of  
136 thousands of single berries as in Shahood et al. (2020). Since it was not possible to measure  
137 each individual flowering or softening dates, data are interpreted as a function of berry sugar  
138 concentration, a proxy for internal time of fruit ripening (Rienth et al., 2016).

### 139 **Berry development and sugar accumulation**

140 **Figure 1** shows the evolution of berry weight and tartaric acid concentration during ripening  
141 of Morrastel N, representative of the panel of varieties described in this study. Observed  
142 trends are typical of *V. vinifera* genotypes with a nearly doubling berry volume and a twofold  
143 dilution of tartaric acid during ripening. As described in Rienth et al. (2016) and in Bigard et al.  
144 (2020), the dilution of tartaric acid appears to be a relevant indicator of berry relative growth  
145 as its quantity doesn't evolve during and after ripening (Ruffner, 1982; Lang & Thorpe, 1989;  
146 Terrier & Romieu, 2001; Rienth et al., 2014; Rösti et al., 2018; Burbidge et al., 2021). When  
147 the uploading of sugars and water in the berries stops (Coombe & McCarthy, 2000; Conde et  
148 al., 2007; Savoi et al., 2021), hexoses and tartaric acids just continue to concentrate due to  
149 evaporation. This results in a linear regression passing through the origin as in **figure 1B**.  
150 Tartaric acid concentration was obviously less heterogeneous than fresh berry weight facilitating  
151 the identification of the max berry volume stage. With this method we could determine the  
152 berry [Hex] at the maximum fruit volume for each variety, i.e. : 920 mmol.L<sup>-1</sup> for G5, 900  
153 mmol.L<sup>-1</sup> for G7, 800 mmol.L<sup>-1</sup> for G14, 1125 mmol.L<sup>-1</sup> for Grenache N, 1125mmol.L<sup>-1</sup> for  
154 Merlot N and 1000 mmol.L<sup>-1</sup> for Morrastel N. We used the 10 closest berries for each genotype  
155 and both stages (end of green growth and max berry volume) to perform statistics as recorded  
156 in **Table 1**. For the end of the green growth period, the 10 berries showing the highest malic  
157 acid concentration were selected.

158

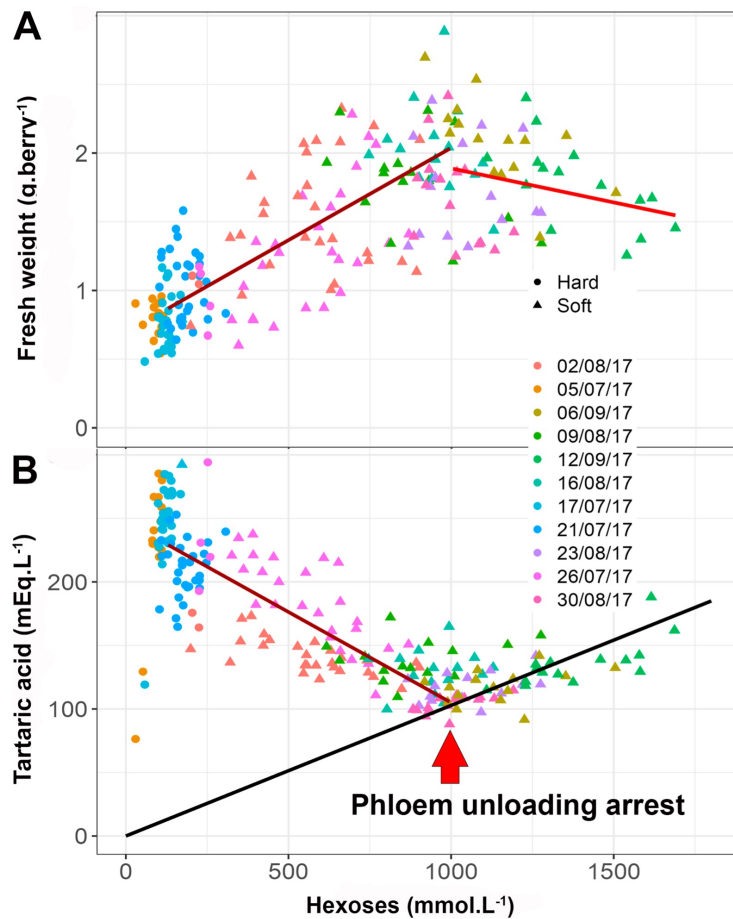

159

160 **Fig. 1** - Evolution of fresh weight (A) and tartaric acid concentration (B) of single berries of Morrastel during  
161 ripening.

162

163 Despite genotypic differences in berry weight at green stage (**Fig. 2A**), the 6 genotypes  
164 displayed the classical fruit expansion kinetics during ripening (Coombe, 1976). The relative  
165 volume increment (i.e.  $V_{ripe}/V_{veraison}$ ) was obtained using all combinations possible  
166 between green and ripe selected berries and ranged from  $1.8 \pm 0.5$  to  $3.1 \pm 0.7$ , for Merlot  
167 N and G5 respectively. Statistical analyses revealed that G5 had the highest berry growth  
168 during ripening followed by G7 and Morrastel N, then G14 and Grenache N with Merlot N has  
169 the least.

| Genotype        | Stage | FW (g.berry <sup>-1</sup> ) |         | Text. (g.mm <sup>-1</sup> ) |        | Hex. (mmol.L <sup>-1</sup> ) |        | TA (meq.L <sup>-1</sup> ) |        | MA (meq.L <sup>-1</sup> ) |       | K (mmol.L <sup>-1</sup> ) |     | Mg (mmol.L <sup>-1</sup> ) |        | Ca (mmol.L <sup>-1</sup> ) |        | Acidity (meq.L <sup>-1</sup> ) |       |
|-----------------|-------|-----------------------------|---------|-----------------------------|--------|------------------------------|--------|---------------------------|--------|---------------------------|-------|---------------------------|-----|----------------------------|--------|----------------------------|--------|--------------------------------|-------|
|                 |       | Mean                        | SD      | Mean                        | SD     | Mean                         | SD     | Mean                      | SD     | Mean                      | SD    | Mean                      | SD  | Mean                       | SD     | Mean                       | SD     | Mean                           | SD    |
| G14             | Green | 1.3                         | 0.4 ab  | 1993                        | 428 ab | 66                           | 11 a   | 172                       | 16 a   | 447                       | 10 a  | 43                        | 6 b | 1.9                        | 0.6 a  | 4.9                        | 2.7 na | 576                            | 23 ab |
| G5              |       | 0.9                         | 0.1 cd  | 1911                        | 331 ab | 73                           | 15 ab  | 209                       | 33 abc | 547                       | 25 b  | 44                        | 8 b | 1.6                        | 1.0 a  | 4.5                        | 2.2 na | 712                            | 54 c  |
| G7              |       | 1.3                         | 0.2 a   | 1683                        | 605 ab | 110                          | 55 bcd | 194                       | 38 ab  | 552                       | 30 b  | 42                        | 5 b | 2.8                        | 1.1 ab | 5.3                        | 1.8 na | 705                            | 62 c  |
| Grenache        |       | 1.1                         | 0.3 abc | 1861                        | 446 ab | 99                           | 13 cd  | 219                       | 32 bc  | 375                       | 27 c  | 31                        | 5 a | 2.7                        | 0.9 ab | 4.6                        | 0.7 na | 562                            | 38 a  |
| Merlot          |       | 0.9                         | 0.2 bcd | 2088                        | 431 b  | 78                           | 17 abc | 254                       | 34 c   | 430                       | 17 ac | 55                        | 5 c | 3.7                        | 1.0 b  | 5.4                        | 1.6 na | 629                            | 37 bd |
| Morrastel       |       | 0.7                         | 0.2 d   | 1490                        | 356 a  | 122                          | 14 d   | 248                       | 17 c   | 451                       | 11 a  | 45                        | 6 b | 2.9                        | 0.6 b  | 4.4                        | 1.0 na | 655                            | 16 cd |
| Test & Post-Hoc |       | Kruskal-Wallis & Dunn       |         | Anova & Tukey               |        | Kruskal-Wallis & Dunn        |        | Kruskal-Wallis & Dunn     |        | Kruskal-Wallis & Dunn     |       | Kruskal-Wallis & Dunn     |     | Anova & Tukey              |        | Kruskal-Wallis & Dunn      |        | Kruskal-Wallis & Dunn          |       |
| Genotype effect |       | 4 10 <sup>-5</sup> ***      |         | 4.6 10 <sup>-2</sup> *      |        | 1.6 10 <sup>-5</sup> ***     |        | 2 10 <sup>-5</sup> ***    |        | 9 10 <sup>-10</sup> ***   |       | 1 10 <sup>-9</sup> ***    |     | 7 10 <sup>-5</sup> ***     |        | 6.1 10 <sup>-1</sup>       |        | 1 10 <sup>-8</sup> ***         |       |
| G14             | Ripe  | 2.5                         | 0.3 b   | 163                         | 79 na  | 809                          | 33 a   | 80                        | 8 ab   | 57                        | 26 ab | 56                        | 6 b | 2.0                        | 0.4 a  | 1.9                        | 0.5 a  | 80                             | 25 a  |
| G5              |       | 2.5                         | 0.4 bc  | 152                         | 41 na  | 918                          | 13 b   | 75                        | 10 a   | 72                        | 30 ab | 57                        | 4 b | 1.8                        | 0.4 a  | 2.6                        | 0.7 ab | 90                             | 36 a  |
| G7              |       | 3.1                         | 0.7 c   | 196                         | 59 na  | 905                          | 17 ab  | 98                        | 19 bc  | 87                        | 27 b  | 57                        | 4 b | 2.9                        | 0.3 b  | 2.2                        | 0.6 a  | 128                            | 39 a  |
| Grenache        |       | 2.2                         | 0.5 ab  | 184                         | 33 na  | 1130                         | 23 c   | 105                       | 12 cd  | 59                        | 31 ab | 47                        | 8 a | 2.7                        | 0.5 b  | 2.8                        | 0.8 ab | 116                            | 37 a  |
| Merlot          |       | 1.6                         | 0.3 a   | 217                         | 89 na  | 1123                         | 9 cd   | 126                       | 18 e   | 42                        | 19 a  | 64                        | 6 b | 3.7                        | 0.6 c  | 3.7                        | 0.8 b  | 104                            | 36 a  |
| Morrastel       |       | 1.8                         | 0.4 a   | 154                         | 43 na  | 997                          | 9 bd   | 121                       | 22 de  | 59                        | 27 ab | 64                        | 8 b | 2.9                        | 0.7 b  | 3.0                        | 1.9 ab | 116                            | 47 a  |
| Test & Post-Hoc |       | Anova & Tukey               |         | Anova                       |        | Kruskal-Wallis & Dunn        |        | Anova & Tukey             |        | Anova & Tukey             |       | Anova & Tukey             |     | Anova & Tukey              |        | Kruskal-Wallis & Dunn      |        | Anova & Tukey                  |       |
| Genotype effect |       | 2.61 10 <sup>-8</sup> ***   |         | 1.26 10 <sup>-1</sup>       |        | 1.5 10 <sup>-10</sup> ***    |        | 4 10 <sup>-10</sup> ***   |        | 1.3 10 <sup>-2</sup> *    |       | 5 10 <sup>-7</sup> ***    |     | 2 10 <sup>-11</sup> ***    |        | 5 10 <sup>-4</sup> ***     |        | 5 10 <sup>-2</sup> *           |       |

170

171 **Table 1** - Berry weight, firmness and composition of the 6 studied genotypes at the end of green growth phase  
 172 and at physiological ripe stage. FW (Fresh weight), Text. (Texture), Hex (Hexoses), TA (Tartaric acid), MA (Malic  
 173 acid). Statistical significance: \* (p<0.01), \*\* (p<0.001), \*\*\* (P<0.0001), na (p>0.01).

174

175 Whatever the genotype, we observed a considerable heterogeneity in berry size at a similar  
 176 [Hex], as previously reported (Gouthu et al. 2014; Vondras et al., 2016; Bigard et al. 2019;  
 177 Shahood et al., 2020). Both the maximum volume of the berries and [Hex] at this stage varied  
 178 according to the variety (**Fig. 2A**). [Hex] increased during ripening, from values around 100  
 179 mmol.L<sup>-1</sup> at the end of the green growth phase to 0.8 to 1.1 mol.L<sup>-1</sup> at physiological ripe stage  
 180 (**Table 1**). During berry ripening, with ca 0.5 M each, glucose and fructose became the major  
 181 osmoticums as reported before in *V. vinifera* (Hawker et al., 1976; Liu et al., 2006; Shiraishi et  
 182 al., 2010). [Hex] observed in this study at phloem arrest for the Merlot N and Grenache N are  
 183 lower than the usual concentration threshold of 1.2 to 1.5 mol.L<sup>-1</sup> [Hex] at which the industry  
 184 considers the berries as technologically ripe. Kliewer (1967) reported a range from 1 mol.L<sup>-1</sup>  
 185 to 1.5 mol.L<sup>-1</sup> [Hex] as the technical ripe grape for usual *V. vinifera* varieties. This apparent  
 186 discrepancy is due to the very common practice to push grapes towards over-ripeness to get  
 187 more redfull, aromatic wines and concentrated wines (Antalick et al., 2021). In the absence of  
 188 supplementary physiological landmarks, the use of [Hex] for comparative studies is very  
 189 hazardous, as this parameter steadily increases after phloem unloading arrest because of fruit  
 190 shriveling (Friend et al., 2009; Shahood et al., 2020; **Fig. 2A**).

191 Sucrose unloading in berries of all genotypes dramatically increased at softening, or relaxation  
 192 of turgor pressure (**Fig. S1**). All genotypes displayed a glucose/fructose higher than 2.2 before  
 193 fruit softening, then the ratio progressively converged to 1 as reported in other *V. vinifera*

194 varieties (Varandas et al., 2004). No specific metabolic trends could be observed in the G  
195 genotypes. It is known that berry glucose/fructose balance which depends on grapevine  
196 organs and developmental stage can be used as a metabolic indicator of fruit ripening (Kliwer  
197 et al., 1966). During green growth, the preferential use of fructose is obvious, leading to  
198 elevated G/F ratio. At softening, the import of sucrose dramatically accelerates, exceeding  
199 metabolic needs, insofar as malic acid replaces sugar as a respiratory substrate. Consequently,  
200 the G/F ratio rapidly tends to 1 (Amerine and Thoukis, 1958; Liang et al., 2011; Houel et al.,  
201 2015).  
202

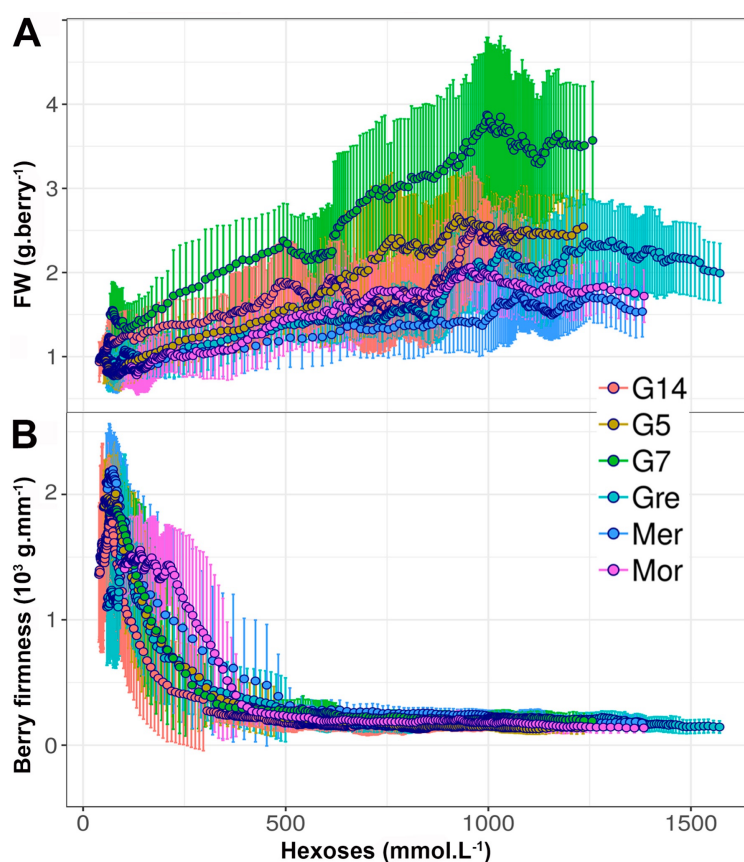

203  
204 **Fig. 2** - Evolution of the berry fresh mass (A) and firmness (B) during the fruit ripening of 6 grapevine varieties.  
205

206 Within a range of extreme varieties and offsprings Bigard et al. (2018) showed that [Hex] can  
207 vary from 750 to 1350mmol.L<sup>-1</sup> when solute unloading stops just before berry shriveling. Here,  
208 considering phloem arrest as the physiological ripe stage, G genotypes displayed [Hex] levels  
209 between 0.8 and 0.9 mol.L<sup>-1</sup>, Morrastel N was at 1 mol.L<sup>-1</sup>, Merlot N and Grenache N showed  
210 the highest [Hex] (> 1.1 mol.L<sup>-1</sup>). These data agree with previous results obtained at the whole  
211 berry population levels with similar genotypes (Ojeda et al., 2017; Bigard et al., 2019).  
212 Interestingly, the final quantity of sugar per fruit unit in sugarless genotypes is of the same

213 magnitude as classical varieties, i.e : 2.8 +/- 0.3 mM (G7), 2.5 +/- 0.6 mM (G5), 2.3 +/- 0.4 mM  
214 (G5), 2.0 +/- 0.3 mM (G14), 1.8 +/- 0.3 mM (Merlot) and 1.8 +/- 0.4 mM (Morrastel) per berry.  
215 Before softening, berry firmness showed some differences in berries at the end of the green  
216 growth phase with the Morrastel N and the Merlot N respectively showing the least and the  
217 most firm fruits (**Table 1**). From the green growth phase, mechanical properties of the berries  
218 evolved in the same way for all genotypes (**Fig. 2B**). Berries soften rapidly at the beginning of  
219 ripening to reach a low level of firmness before 500 mmol.L<sup>-1</sup> of [Hex], i.e. more or less mid  
220 ripening. Then, with a slow and continuous decrease of the firmness up to physiological ripe  
221 stage and over-ripening, no firmness differences could be observed between sugarless  
222 genotypes and traditional cultivars (**Table 1, Fig. S1**). Therefore, although firmness is widely  
223 accepted as a sensitive and early indicator of the onset of ripening (Coombe et al. 1992; Abbal  
224 et al., 1992; Castellarin et al., 2015; Shahood et al., 2020; Bigard et al., 2020), this parameter  
225 can't be used to tag the transition at phloem unloading arrest. Consequently, the only way to  
226 non destructively determine the shift from fruit expansion to shriveling remains the  
227 monitoring of berry growth. As discussed below, this can be done indirectly, using Tartrate  
228 concentration

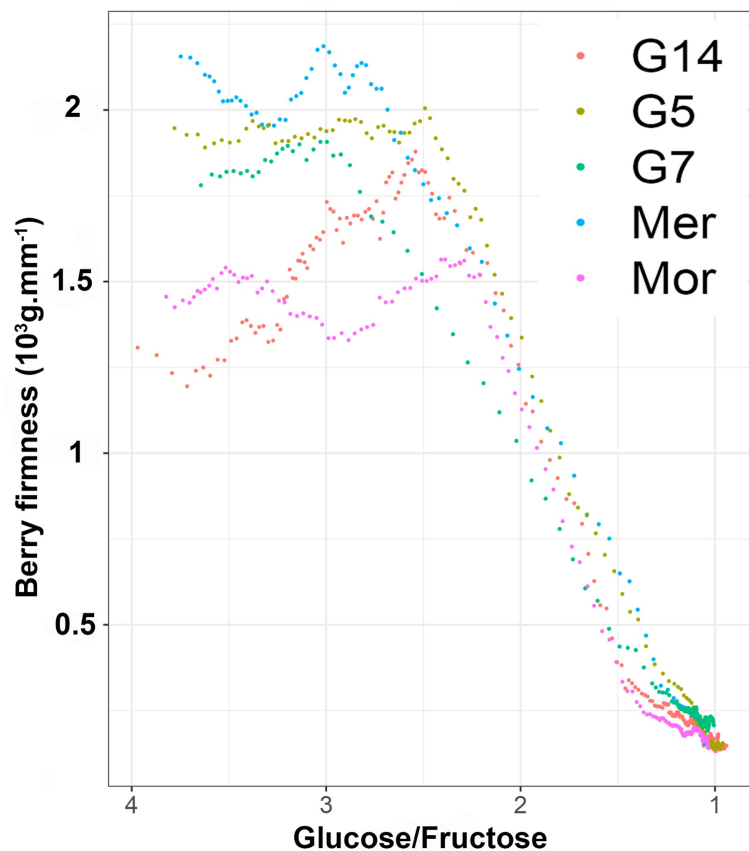

229  
230  
231

**Fig. S1** - Evolution of the berry firmness depending on glucose/fructose ratio during the fruit ripening.

## 232 Evolution of the main determinants of fruit acidity

233 **Tartaric acid** - During ripening, tartaric concentration depended on the variety and the stage  
234 of berry development (**Table 1**). At the onset of ripening, tartaric acid concentration was 25%  
235 lower (150 vs 200 mEq.L<sup>-1</sup>) in all G genotypes. Tartaric acid dilution (**Fig. S2**) proceeded at  
236 negligible rate before 220 mmol.L<sup>-1</sup> (G5, G14) to 300 mmol.L<sup>-1</sup> [Hex] (Grenache N) and then  
237 accelerated confirming the delay between berry softening and growth resumption (Castellarin  
238 et al., 2015; Shahood et al., 2020 and other literature cited in this paper).

239 The change in tartaric acid from the starting to the end of ripening (**Fig. 3**), is consistent with  
240 a first two to three fold dilution, followed by concentration due to shriveling, leading to a  
241 linear increase in sugar and tartaric acid passing the origin. At the arrest of phloem unloading,  
242 the concentration of tartaric acid reached a minimum ranging from 75 +/- 10 mEq.L<sup>-1</sup> (G5) to  
243 126 +/- 18 mEq.L<sup>-1</sup> (Merlot N). Grenache N displayed a 104 +/- 12 mEq.L<sup>-1</sup> concentration in  
244 tartaric acid at the ripe stage.

245

246

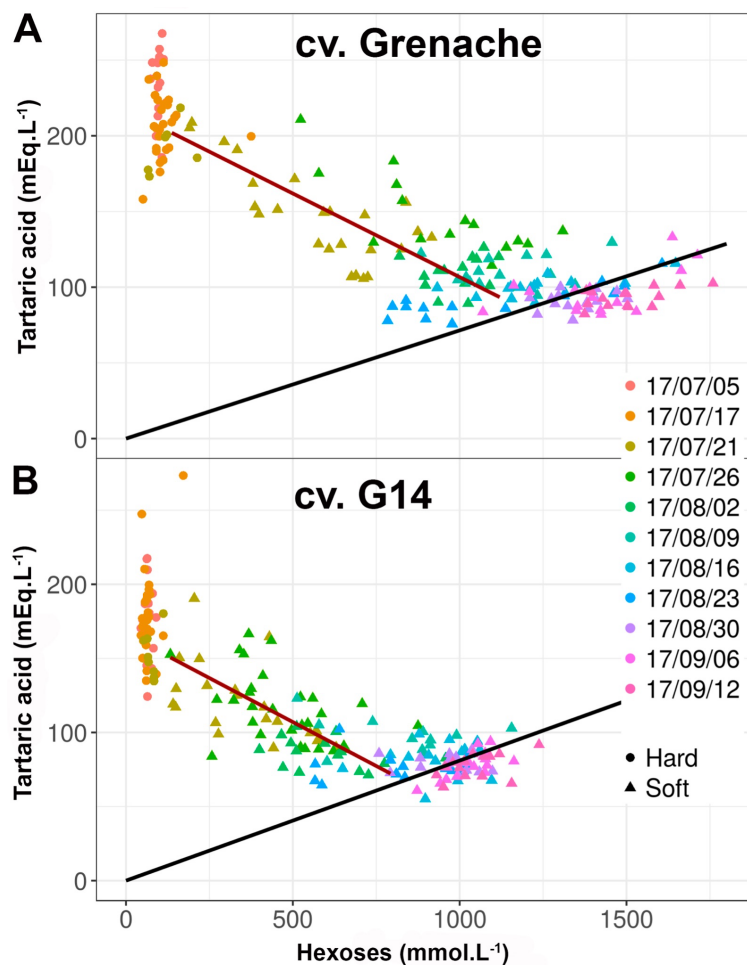

247



248 **Fig. 3** - Evolution of the tartaric acid concentration during berry ripening of Grenache (A) and G14 (B). Lines  
249 corresponding to linear fitting during and after phloem unloading.  
250

251

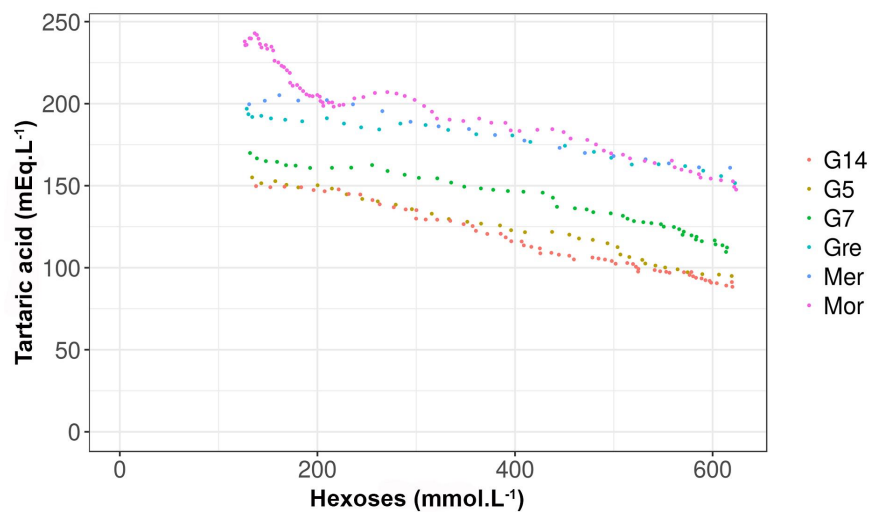

252

253 **Fig. S2** - Evolution of the tartaric acid concentration at the early stages ([Hex] from 125 and 625 mmol.L<sup>-1</sup>) of fruit  
254 ripening of 6 grapevine varieties.  
255

256

257

258 Tartaric acid is the first organic acid to be accumulated during young berry development and  
259 remains one of the main acids in ripe fruits of *Vitis vinifera* (Amerine et al., 1965; Kliewer,  
260 1966). In this study performed through single berry analysis, tartaric acid ranged from 170-  
261 250 mEq.L<sup>-1</sup> at the beginning of ripening to decrease to 70-120 mEq.L<sup>-1</sup> at phloem stop as  
262 previously observed (Bigard et al., 2019). Statistical analyses showed that, at the onset of  
263 ripening, sugarless genotypes already display a lower tartaric acid concentration than  
264 traditional cultivars. This trend is amplified at maximum volume stage due to the highest  
265 expansion and resulting dilution (**Table 1**). Morrastel N, also called Graciano in Spain, is a  
266 traditional cultivar producing wines rich in polyphenols with moderate ethanol levels (Ramos  
267 and Martinez de Toda, 2021). We confirm here, through this study performed at single berry  
268 level, that Morrastel N can produce ripe fruit at lower [Hex], i.e. below 1 mol.L<sup>-1</sup>, in  
269 comparison to other traditional varieties.

269 **Malic acid** - Malic acid concentration peaked at 370-550 mEq.L<sup>-1</sup> at the very end of green  
270 growth period and then decreased to less than 90 mEq.L<sup>-1</sup> at maximum berry volume whatever  
271 the genotype (**Table 1**). At the onset of ripening, conversely to tartaric acid, malic acid  
272 concentration was higher in sugarless genotypes than in traditional varieties. At the arrest of  
273 phloem unloading, the concentrations in malic acid ranged from 42 +/- 20 mEq.L<sup>-1</sup> (Grenache  
274 N) to 87 +/- 26 mEq.L<sup>-1</sup> (G7), with no obvious genotypic effects. After phloem arrest, conversely

275 to tartaric acid, malic acid concentration stayed stable or even slightly decreased (**Fig. 4**), as  
276 observed in previous studies performed at berry population levels (Ojeda et al., 2017; Bigard  
277 et al., 2019).

278

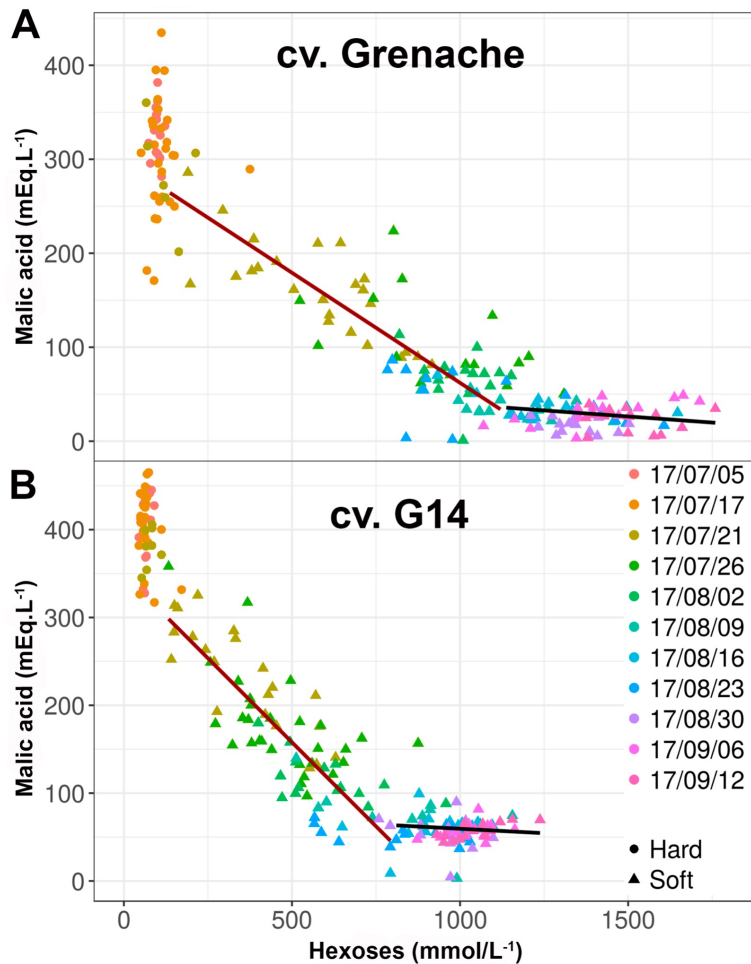

279

280 **Fig. 4** - Evolution of the malic acid concentration during berry ripening of Grenache (A) and G14 (B). Lines  
281 corresponding to linear fitting during and after phloem unloading.

282

283 Malic acid respiration provides a major fraction of the energy during early ripening (Famiani  
284 et al., 2014; Shahood, 2017), hence a faster decrease in concentration than if only dependent  
285 on dilution due to berry growth. Here, despite different starting points (**Table 1, Fig. S3**), the  
286 decrease of malic acid during the first phase of ripening (i.e. from 250 to 800  $\mu\text{mol}\cdot\text{berry}^{-1}$   
287 [Hex]), was characterized by an initial slope of -1 mEq per 2 hexoses, noticeably similar in the  
288 6 genotypes (**Fig. S3**). During early ripening, the initial changes in the respective amounts of  
289 malic acid and sugar per fruit (concentration x volume; **Fig. 5**) are fully consistent with the  
290 activation of a sucrose/H<sup>+</sup> exchanger on the tonoplast of all *V. vinifera* cultivars investigated,  
291 including sugarless genotypes, which generalizes our quantitative data on Syrah and Pinot

292 (Shahood et al., 2020). In single berries, the corresponding genes are strongly expressed until  
293 phloem arrest (Savoi et al., 2021). At the beginning of ripening, the sucrose/H<sup>+</sup> exchange is  
294 electro-neutralized by the release of vacuolar malate, as detected here, while more and more  
295 H<sup>+</sup> must be redirected to the vacuole as malic acid vanishes, as illustrated by the progressive  
296 activation of vacuolar ATPase and PPIase (Terrier et al., 2001).

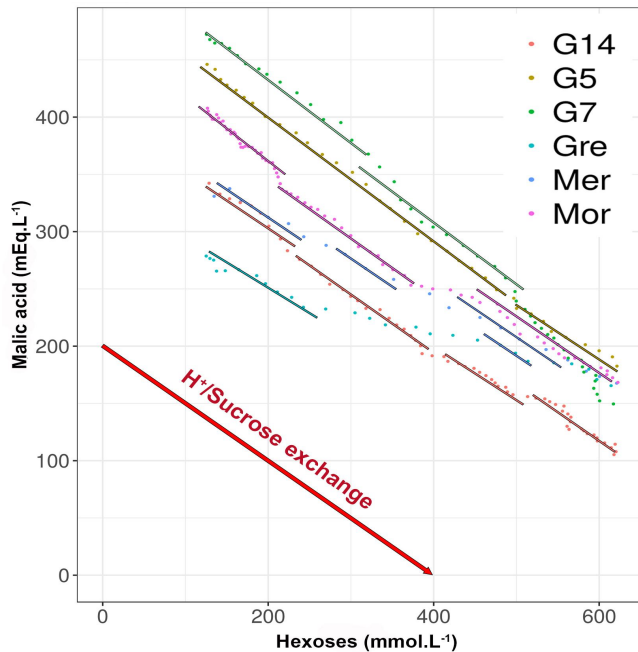

297

298 **Fig. S3** - Repeatability of the malic acid/sugar exchange during early berry ripening (125-625 mmol.L<sup>-1</sup> [Hex]) of  
299 6 grapevine varieties.

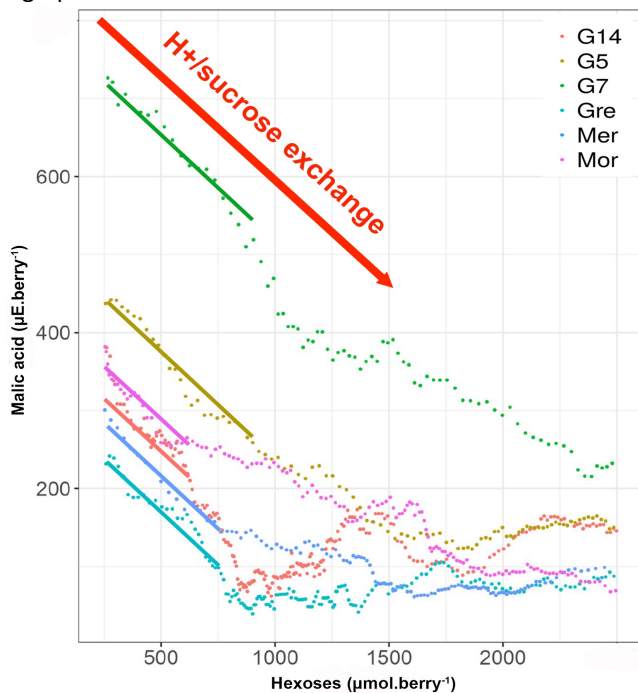

300

301

302 **Fig. 5** - Repeatability of the malic acid/sugar exchange expressed in quantity per fruit during berry ripening of 6  
303 grapevine varieties.

304

305 When the cumulative evolution of tartaric + malic acids was monitored during early ripening  
306 (**Fig. S4 A**), no specific behaviors could be observed in the sugarless genotypes in comparison  
307 to the other varieties. Considering that, according to their concentrations, sugars and organic  
308 acids are the main contributors to the osmotic potential of the berry (Matthews et al., 1987),  
309 present results totally exclude that the reduction in sugar concentration may be compensated  
310 by a greater accumulation of organic acids in the sugarless genotypes. As mentioned before,  
311 sugarless genotypes displayed lower tartaric and higher malic acid than traditional controls  
312 and consequently an higher malic acid/tartaric acid ratio (**Fig. S4 B**).

313

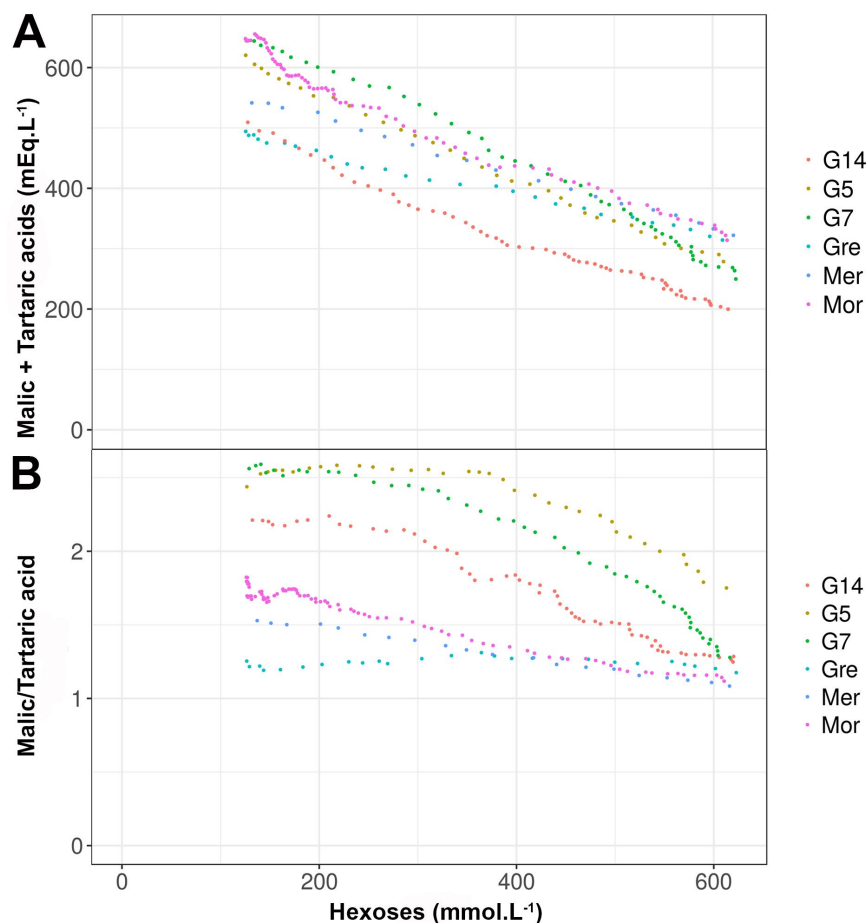

314

315 **Fig. S4** - Evolution of the sum of malic and tartaric acid concentration (A) and malate/tartrate (B) during early  
316 berry ripening (125-625 mmol.L<sup>-1</sup> [Hex]) of 6 grapevine varieties.

317

318 **Potassium** - K<sup>+</sup>, the main cation in the grapevine fruit, is accumulated during both phases of  
319 growth (Cuellar et al., 2013). Here, concentrations before ripening ranged from 31 ± 5 mEq.L<sup>-1</sup>  
320 for Grenache N to 55 ± 5 mEq.L<sup>-1</sup> for the Merlot N (**Table 1**). During ripening, [K<sup>+</sup>] increased  
321 moderately during ripening (**Fig. S5**) with increments ranging from 16% (Merlot N) to 50%  
322 (Grenache N) both genotypes displaying the lower and the higher levels of [K<sup>+</sup>] at the ripe

323 stage, respectively  $47 \pm 8$  mEq.L<sup>-1</sup> for Grenache N and  $64 \pm 6$  mEq.L<sup>-1</sup> for Merlot N. After the  
324 period of phloem loading arrest, as for tartaric acid, [K<sup>+</sup>] steadily increased in link to water  
325 loss associated with shriveling (**Fig. 6**).

326

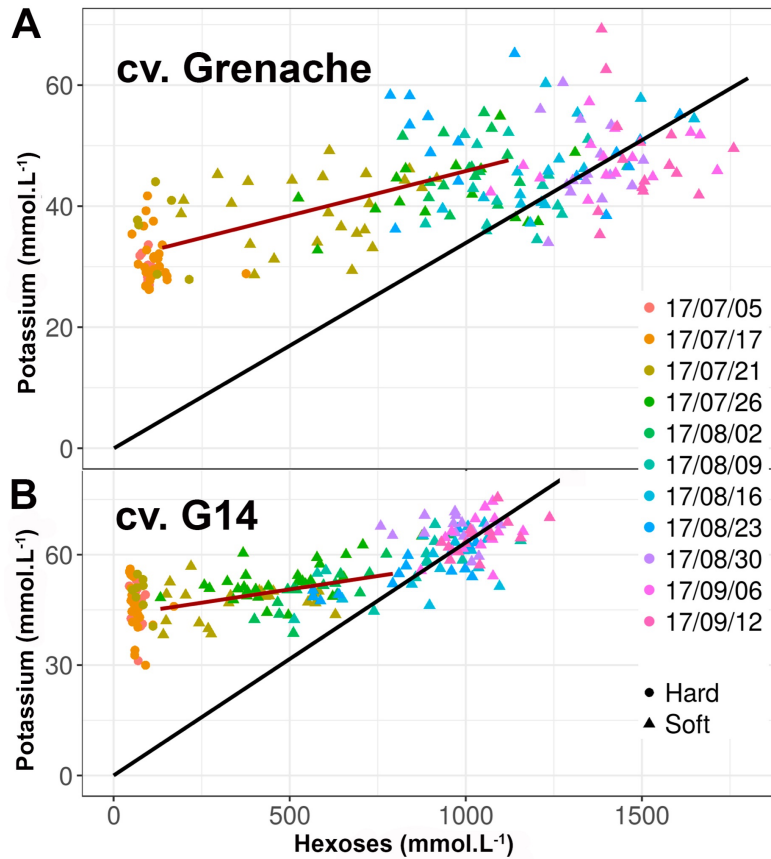

327

328 **Fig. 6** - Evolution of the potassium concentration during berry ripening of Grenache (A) and G14 (B). Lines  
329 corresponding to linear fitting during and after phloem unloading.

330

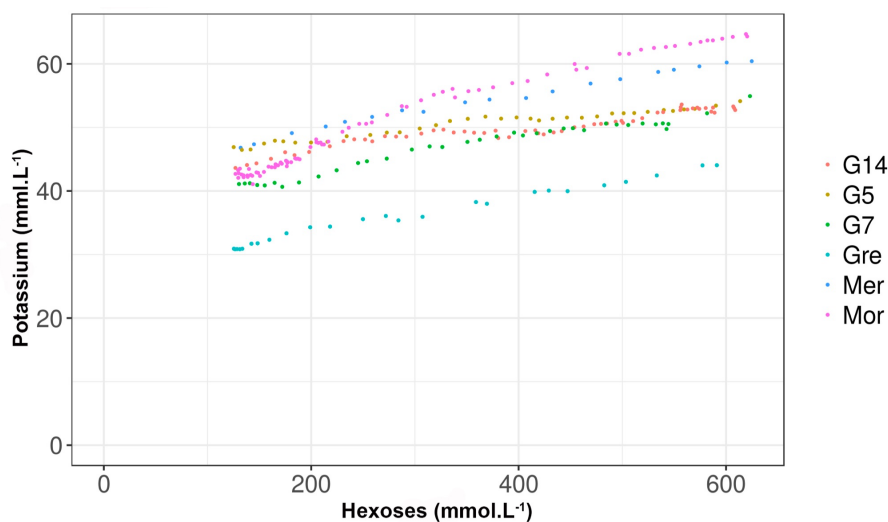

331

332 **Fig. S5** - Evolution of the potassium concentration during early ripening (125-625 mmol.L<sup>-1</sup> [Hex]) of 6 grapevine  
333 varieties.

334

335 After main organic compounds,  $K^+$  is the fourth contributor to berry osmotic potential, also  
336 neutralizing a fraction of organic acids (Storey, 1987; Rogiers et al., 2017). During early stages  
337 of development, low sugar accumulators (Morrastel N included) had a higher  $[K^+]$  than high  
338 accumulators (**Table 1**). This element being mainly accumulated in the skin may play a role in  
339 the difference in elasticity from G genotypes. At the end of phloem unloading the average  $[K^+]$   
340 is around  $50 \text{ mmol.L}^{-1}$  in the 6 genotypes, suggesting a strong homeostasis for this element.  
341 During the phloem unloading period from veraison to max berry volume, as observed at  
342 population level with other genotypes (Bigard et al., 2020),  $K^+$  concentration increased 20-40  
343 times less than hexoses (**Fig. 5, Fig. S5, Table 1**).

344 This obviously contradicts the so-called "massive"  $K^+$  import in the ripening berry (Villette et  
345 al., 2020). As recently discussed by Savoi et al. (2021), the belief that  $K^+$  transport would  
346 compensate for an intrinsic deficiency in the energisation of sugar imports is not supported  
347 by experimental data. In this respect, the simultaneous and parallel increases in  $[Hex]$  and  
348  $[K^+]$  observed after the arrest of phloem unloading, isn't indicative of a co-transport  
349 mechanism, but only results from a net water loss and berry shriveling. Despite significant  
350 progress in the understanding of the import of potassium in grapevine berries (Rogiers et al.,  
351 2017; Villette et al., 2020; Savoi et al., 2021), the putative mechanistic links between potassium  
352 and sugar imports still remain speculative.

353 **Evolution of the fruit acidity** - Green berries displayed a high acidity (**Fig. 7, Table 1**) ranging  
354 from  $560 \pm 40 \text{ mEq.L}^{-1}$  (Grenache N) to  $710 \pm 50 \text{ mEq.L}^{-1}$  (G5). As the results of tartaric acid  
355 dilution, malic acid respiration and dilution, and slight  $K^+$  accumulation, acidity was reduced  
356 to  $80 \pm 25 \text{ mEq.L}^{-1}$  (G14) to  $130 \pm 40$  (G7) at the ripe stage with no statistical differences  
357 between genotypes. Noticeably, the total acidity tended to increase very late the ripe stage  
358 for all genotypes, ca  $1250 \text{ mmol.L}^{-1} [Hex]$  in Grenache N, and  $1000 \text{ mmol.L}^{-1} [Hex]$  in G14.

359



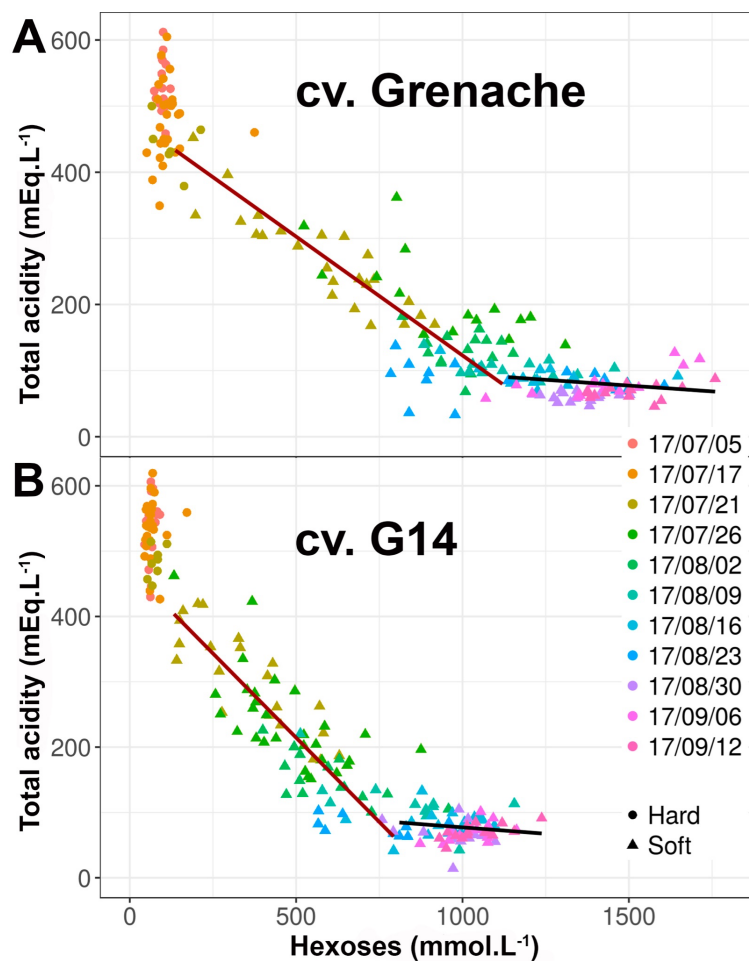

360

361 **Fig. 7** - Evolution of the juice total acidity during berry ripening of Grenache (A) and G14 (B). Lines corresponding  
362 to linear fitting during and after phloem unloading.

363

364 Acidity is a major challenge for wine quality (Champagnol, 1984; Sweetman et al., 2014; Ollat  
365 et al., 2018). The effect of temperature on grape acidity is well documented (Kliwer and Lider,  
366 1970; Butrose et al., 1971; Seguin et al., 2004; Rienth et al., 2016). By virtue of the  
367 electroneutrality principle, titratable (or total) acidity represents the difference between acids  
368 (mainly tartaric and malic in grapevine) and cations (mainly K<sup>+</sup> in plants) . The reports of  
369 Bigard et al. (2018; 2020), Duchène et al. (2020), that detailed the genetic diversity for anions  
370 (i.e. organic acids) and cations and the consequence in grape acidity in a set of extreme *V.*  
371 *vinifera* varieties and offsprings, here we analyzed the determinants of the acidity of 6  
372 varieties, including 3 sugarless genotypes. As shown in previous sections, sugarless genotypes  
373 tend to display a malic acid/tartaric acid ratio higher than the 3 traditional cultivars but with  
374 similar sums of malic + tartaric acids and K<sup>+</sup> levels. As the results, the sugarless genotypes  
375 presented similar levels of acidity at the same physiological ripe stage than other varieties.

### 376 **3. Other cations (Mg<sup>2+</sup>, Ca<sup>2+</sup>)**

377

378 Magnesium ( $Mg^{2+}$ ) was much less accumulated than  $K^+$  in all genotypes.  $[Mg^{2+}]$  displayed very  
379 few changes during ripening (**Table 1, Fig. S6, Fig. S7**). At the arrest of phloem unloading,  
380  $[Mg^{2+}]$  ranged from 1.6 +/- 1.0 (G5) to 3.7 +/- 1.0 (Merlot N)  $mEq.L^{-1}$ . Ranging from 4.5 +/- 2.2  
381 (G5) to 5.4 +/- 1.6 (Merlot N)  $mEq.L^{-1}$ , Calcium ( $Ca^{2+}$ ) was found more accumulated in the green  
382 berries than  $Mg^{2+}$  (**Table 1**). Then during ripening,  $[Ca^{2+}]$  tended to decrease (**Fig. S8 and S9**),  
383 ending with concentrations of 1.9 +/- 0.5 (G14) to 3.7 +/- 0.8 (Merlot N)  $mEq.L^{-1}$ , a relative  
384 decrease quite comparable to that of tartaric acid. Therefore, its total amount per berry  
385 remains constant during ripening, as widely accepted in grapevine, and consistent with its  
386 almost exclusive transport by xylem (Glad et al., 1992; Creasy et al., 1993). Both cations didn't  
387 have a major impact on the wine quality and presented very few variations within the panel  
388 of varieties.  
389

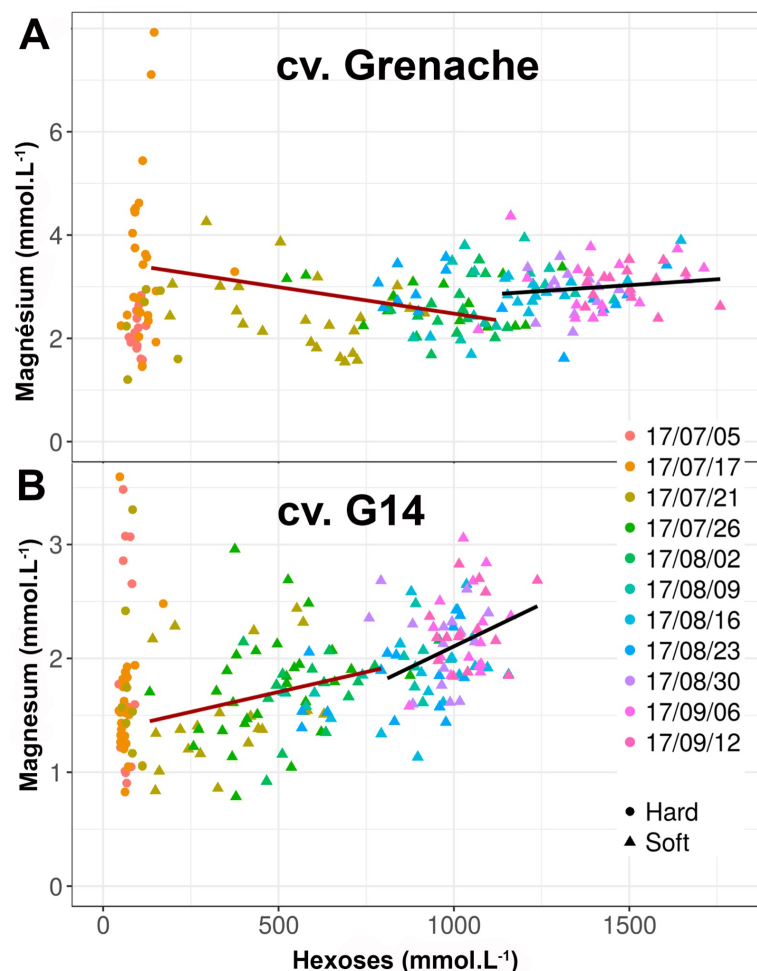

390  
391 **Fig. S6** - Evolution of the magnesium concentration during berry ripening of Grenache (A) and G14 (B). Lines  
392 corresponding to linear fitting during and after phloem unloading.  
393

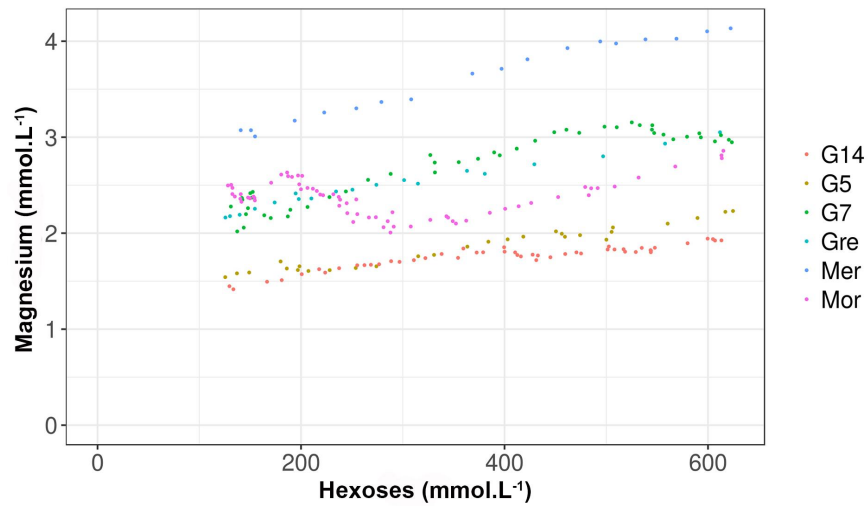

394  
395  
396  
397  
398

**Fig. S7** - Evolution of the magnesium concentration during early ripening (125-625 mmol.L<sup>-1</sup> [Hex]) of 6 grapevine varieties.

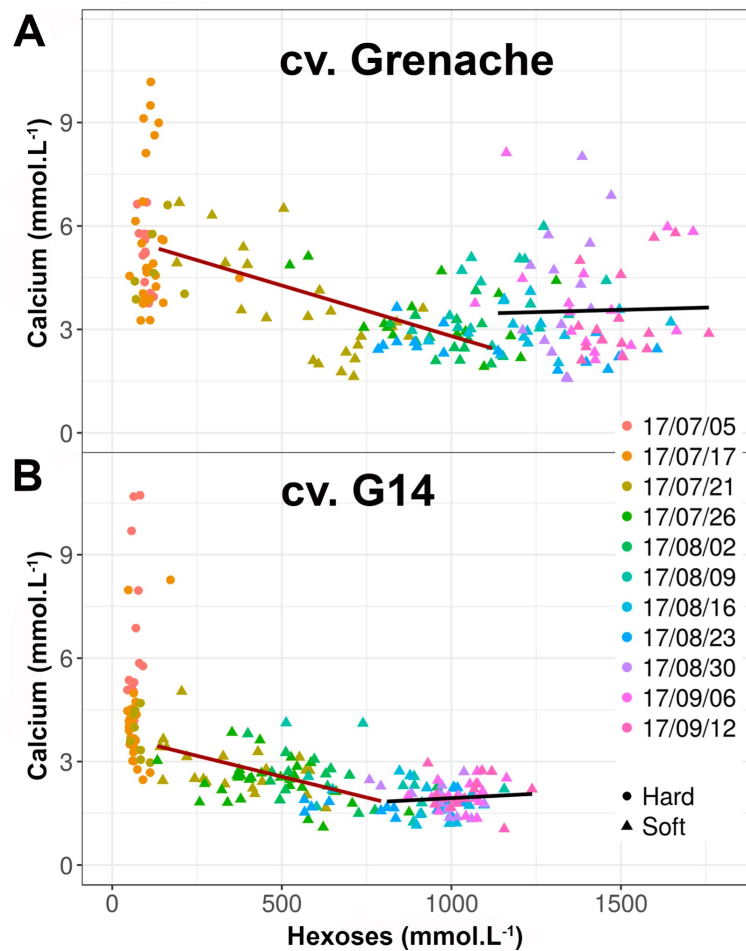

399  
400  
401  
402  
403

**Fig. S8** - Evolution of the calcium concentration during berry ripening of Grenache (A) and G14 (B). Lines corresponding to linear fitting during and after phloem unloading.

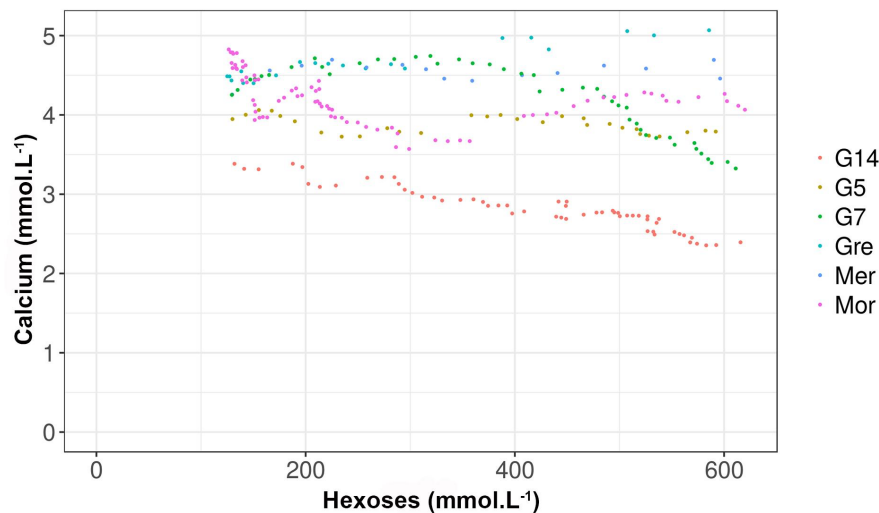

404  
405  
406

**Fig. S9** - Evolution of the calcium concentration during early ripening ( $125\text{-}625\text{ mmol.L}^{-1}$  [Hex]) of 6 grapevine varieties.

407  
408

## Conclusion

410

411 Getting fruits with reduced [Hex] while preserving their acidity represents an option to  
412 mitigate the effect of climate warming on grapevine fruit quality (Torregrosa et al., 2017). This  
413 objective can't be fully addressed by viticultural practices, e.g. harvesting before complete  
414 sugar unloading or removing a fraction of the leaves to reduce C photoassimilation, without  
415 impacting the quality of the wines (Bobeica et al., 2015; Antalick et al., 2021). Some diversity  
416 can be found in *V. vinifera* varieties, or can be obtained by crossbreeding, for water, sugars  
417 and the determinants of acidity of the grape (Bigard et al., 2018, 2020). In this study, using  
418 advanced methods of berry phenotyping, we have characterized the fruit development and  
419 ripening of a set of new disease-tolerant varieties producing low alcoholic wines (Escudier et  
420 al., 2017). In previous studies, we have shown that combining single fruit phenotyping and  
421 precise physiological landmarks significantly improve the understanding of berry development  
422 features (Shahood et al., 2020; Savoi et al., 2021). Indeed, relations between the major solutes  
423 are no longer biased upon averaging unsynchronized hence developmentally and  
424 metabolically chimeric samples. To circumvent the imprecision of berry growth curves  
425 resulting from the heterogeneity in berry size, tartaric acid dilution was used to detect the  
426 timing of phloem unloading arrest. This study showed that the sugarless genotypes display a  
427 [Hex] reduced by 20-30% when reaching ripe stage without impacting berry growth, organic  
428 acid and cations accumulation levels. No major difference being found for fruit growth rates  
429 and the quantity of sugars per berry in comparison to control varieties, this suggests the

430 sugarless phenotypes undergo a greater cellular expansion at similar osmotic or turgor  
431 pressure. This property is not specific to genotypes deriving from *Muscadinia rotundifolia* and  
432 table grape varieties, because Morrastel N also displayed a limited [Hex] in the ripe fruit (< 1  
433 mol.L<sup>-1</sup>). Moreover, similar behaviors can be found in other traditional varieties, such as  
434 Aramon, Cornifesto and Mandilaria (Bigard et al., 2018) and Glera, a variety used for Prosecco  
435 wine production (<https://plantgrape.plantnet-project.org/fr/cepage/Glera>). Taken together  
436 our results show that adaptive traits to climate changes can be pyramided with QTLs of  
437 tolerance to diseases. By crossing G5 and G14, we have generated microvine segregating  
438 progenies (Torregrosa et al., 2019) to further characterize the physiology of this trait and  
439 investigate the genetic determinism of water, sugar and organic accumulations (Savoi et al.,  
440 2021).

441

442 **Acknowledgements** - Thanks to Eleoneora Maoddi, Yannick Sire and Philippe Abbal for their  
443 contribution in the experiments.

444

## 445 **References**

446

- 447 Abbal, P., Boulet, J. C. & Moutounet, M. (1992). Utilisation de paramètres physiques pour la caractérisation de la  
448 véraison des baies de raisin. J. Int. Sci. Vigne Vin, 26, 231-237.
- 449 Alem, H., Ojeda, H., Rigou, P., Schneider, R. & Torregrosa L. (2021). The reduction of plant sink/source does not  
450 systematically improve the metabolic composition of the *Vitis vinifera* white fruit. Food Chem., 345,  
451 128825. <https://doi.org/10.1016/j.foodchem.2020.128825>.
- 452 Alessandrini, M., Gaiotti, F., Belfiore, N., Matarese, F., D'Onofrio, C. & Tomasi D. (2018). Influence of vineyard  
453 altitude on Glera grape ripening (*Vitis vinifera* L.): effects on aroma evolution and wine sensory profile. J  
454 Sci Food Agric., 97, 2695-2705.
- 455 Amerine, M. A. & Thoukis, G. (1958). The glucose/fructose ratio of California grapes. *Vitis*, 1, 224-229.
- 456 Amerine, M. A., Roessler, E. B. & Ough, C. S. (1965). Acids and the acid taste. I. The effect of pH and titratable  
457 acidity. Am. J. Enol. Vitic., 16, 29-37.
- 458 Antalick, G., Šuklje, K., Blackman, J. W., Schmidtke, L. M. & Deloire A. (2021). Performing sequential harvests  
459 based on berry sugar accumulation (mg/berry) to obtain specific wine sensory profiles. *OenoOne*, 55, 131–  
460 146. <https://doi.org/10.20870/oeno-one.2021.55.2.4527>.
- 461 Arrizabalaga, M., Morales, F., Oyarzun, M., Delrot, S., Gomès, E., Irigoyen, J. J., Hilbert, G. & Pascual I. (2018).  
462 Tempranillo clones differ in the response of berry sugar and anthocyanin accumulation to elevated  
463 temperature. *Plant Sci.*, 267, 74-83. doi: 10.1016/j.plantsci.2017.11.009.
- 464 Asproudi, A., Petrozziello, M., Cavalletto, S. & Guidoni S. (2016). Grape aroma precursors in cv. Nebbiolo is  
465 affected by vine microclimate. *Food Chem.*, 211, 947-956.
- 466 Becard, V., Lacroix, R., Puech, C. & Inaki Garcia de Cortozar-Atauri (2022). Assessment of changes in Grenache  
467 grapevine maturity in a Mediterranean context over the last half-century. *OenoOne*, 56.  
468 <https://doi.org/10.20870/oeno-one.2022.56.1.4727>.
- 469 Bigard, A., Berhe, D. T., Maoddi, E., Sire, Y., Boursiquot, J. M., Ojeda, H., Péros, J. P., Doligez, A., Romieu, C. &  
470 Torregrosa L. (2018). *Vitis vinifera* L. fruit diversity to breed varieties anticipating climate changes.  
471 *Frontiers Plant Sci.*, doi: 10.3389/fpls.2018.00455.
- 472 Bigard, A., Romieu, C., Sire, Y., Veyret, M., Ojeda, H. & Torregrosa L. (2019). Grape ripening revisited through  
473 berry density sorting. *OenoOne* 4, 719-724. DOI:10.20870/oeno-one.2019.53.4.2224.

- 474 Bigard, A., Romieu, C., Sire, Y. & Torregrosa L. (2020). *Vitis vinifera* L. diversity for cations and acidity is suitable  
475 for breeding fruits coping with climate warming. *Frontiers Plant Sci.*, DOI: 10.3389/fpls.2020.01175.
- 476 Bobeica, N., Poni, S., Hilbert, G., Renaud, C., Gomès, E., Delrot, S. & Dai Z. (2015). Differential responses of sugar,  
477 organic acids and anthocyanins to source-sink modulation in Cabernet Sauvignon and Sangiovese  
478 grapevines. *Front. Plant Sci.*, 382. doi:10.3389/fpls.2015.00382.
- 479 Burbidge, C. A., Ford, C. M., Melino, V. J., Wong, D. C. J., Jia, Y., Jenkins, C. L. D., Soole, K. L., Castellarin, S. D.,  
480 Darriet, P., Rienth, M., Bonghi, C., Walker, R. P., Famiani, F. & Sweetman C. (2021). Biosynthesis and  
481 cellular functions of tartaric acid in grapevines. *Frontiers Plant Sci.*, 12. doi:10.3389/fpls.2021.643024.
- 482 Butrose, M. S., Hale, C. R. & Kliewer W. M. (1971). Effect of temperature on the composition of Cabernet-  
483 Sauvignon berries. *Am. J. Enol. Vitic.*, 22, 71-75.
- 484 Castellarin, S. D., Gambetta, G. A., Wada H., Krasnow M. N., Cramer G. R., Peterlunger E., Shackel K. A. & Matthews  
485 M. A. (2015). Characterization of major ripening events during softening in grape: turgor, sugar  
486 accumulation, abscisic acid metabolism, colour development, and their relationship with growth. *J. Exp.*  
487 *Bot.* 67, 709-722. doi: 10.1093/jxb/erv483.
- 488 Champagnol F. (1984). *Éléments de physiologie de la vigne et de viticulture générale*, ed. Dehan (Montpellier,  
489 France: Dehan).
- 490 Conde C., Silva P., Fontes N., Dias A., Tavares R.M., Sousa M.J., Agasse A., Delrot S., Gerós H. (2007)  
491 Biochemical Changes throughout Grape Berry Development and Fruit and Wine Quality. *Food 1*: 1-22.
- 492 Coombe, B. G. (1976). The development of fleshy fruits. *An. Rev. Plant Physiol.*, 27, 507-528.
- 493 Coombe, B. G. (1992). Research on development and ripening of the grape berry. *Am. J. Enol. Vitic.*, 43, 101-  
494 110.
- 495 Coombe, B. G. & McCarthy, M.G. (2000). Dynamics of grape berry growth and physiology of ripening. *Aust. J.*  
496 *Grape Wine Res.*, 6, 131-135. doi:10.1111/j.1755-0238.2000.tb00171.x.
- 497 Cuellar, T., Azeem, F., Andrianteranagna, M., Pascaud, F., Verdeil, J. L., Sentenac, H., Zimmermann, S. & Gaillard  
498 I. (2013). Potassium transport in developing fleshy fruits: the grapevine inward K<sup>+</sup> channel VvK1.2 is  
499 activated by CIPK-CBL complexes and induced in ripening berry flesh cells. *Plant J.*, 73, 1006-1018. doi:  
500 10.1111/tpj.12092.
- 501 Dai, Z. W., Ollat, N., Gomès, E., Decroocq, S., Tandonnet, J. P., Bordenave, L. et al. (2011). Ecophysiological,  
502 genetic, and molecular causes of variation in grape berry weight and composition: a review. *Am. J. Enol.*  
503 *Vitic.*, 62, 413-425. doi: 10.5344/ajev.2011.10116.
- 504 Doumouya, S., Lahaye, M., Maury, C. & Siret R. (2014) Physical and physiological heterogeneity within the grape  
505 bunch: impact on mechanical properties during maturation. *Am. J. Vitic. Enol.*, 65, 170-178. doi:  
506 10.5344/ajev.2014.13062.
- 507 Duchêne, E., Dumas, V., Jaegli, N. & Merdinoglu D. (2012). Deciphering the ability of different grapevine  
508 genotypes to accumulate sugar in berries. *Aust. J. Grape Wine Res.*, 18, 319-328. doi: 10.1111/j.1755-  
509 0238.2012.00194.x.
- 510 Duchêne, E., Dumas, V., Butterin, G., Jaegli, N., Rustenholtz, C., Chauveau, A., Berard, A., Le Paslier, M. C., Gaillard,  
511 I. & Merdinoglu D. (2020). Genetic variations of acidity in grape berries are controlled by the interplay  
512 between organic acids and potassium. *Theor. App. Genet.*, <https://doi.org/10.1007/s00122-019-03524-9>.
- 513 Escudier, H., Bigard, A., Ojeda, H., Samson, A., Caillé, S., Romieu, C. & Torregrosa L. (2017) De la vigne au vin : des  
514 créations variétales adaptées au changement climatique et résistant aux maladies cryptogamiques 1/2 :  
515 La résistance variétale. *Revue des Oenologues*, 44, 16-18.
- 516 Famiani, F., Farinelli, D., Palliotti, A., Moscatello, S., Battistelli, A. & Walker R. B. (2014). Is stored malate the  
517 quantitatively most important substrate utilised by respiration and ethanolic fermentation in grape berry  
518 pericarp during ripening? *Plant Physiol. Biochem.*, 76, 52-57. doi: 10.1016/j.plaphy.2013.12.017.
- 519 Friend, A.P., Trought M.C.T. & Creasy G. L. (2009). The influence of seed weight on the development and growth  
520 of berries and live green ovaries in *Vitis vinifera* L. cvs. Pinot noir and Cabernet-Sauvignon. *Aust. J. Grape*  
521 *Wine Res.*, 15, 166-174.
- 522 Gouthu, S., O'Neil, S. T., Di, Y., Ansarolia, M., Megraw, M. & Deluc L.G. (2014). A comparative study of ripening  
523 among berries of the grape cluster reveals an altered transcriptional programme and enhanced ripening  
524 rate in delayed berries. *J. Exp. Bot.*, 65, 5889-5902. doi: 10.1093/jxb/eru329.
- 525 Gutiérrez-Gamboa, G., Garde-Cerdán, T., Carrasco-Quiroz, M., Pérez-Álvarez, E.P., Martínez-Gil, A.M., Del Alamo-  
526 Sanza, M. & Moreno-Simunovic Y. (2018). Volatile composition of Carignan noir wines from ungrafted and  
527 grafted onto País (*Vitis vinifera* L.) grapevines from ten wine-growing sites in Maule Valley, Chile. *J Sci*  
528 *Food Agric.*, 98, 4268-4278.
- 529 Hawker, J. S., Ruffner, H. P. & Walker R.R. (1976). The sucrose content of some Australian grapes. *Am. J. Enol.*  
530 *Vitic.*, 27, 125-129.



- 531 Houel, C., Chatbanyong, R., Doligez, A. Rienth, M., Foria, S., Luchoire, N., Roux, C., Adivèze, A., Lopez, G., Farnos,  
532 M., Pellegrino, A., This, P., Romieu, C. & Torregrosa L. (2015). Identification of stable QTLs for vegetative  
533 and reproductive traits in the microvine (*Vitis vinifera* L.) using the 18K Infinium chip. BMC Plant Biol.,  
534 15,205. DOI 10.1186/s12870-015-0588-0.
- 535 Kliewer, W. M. (1966). Sugars and Organic Acids of *Vitis vinifera*. Plant Physiol., 41, 923-931.  
536 <http://www.jstor.org/stable/4260763>.
- 537 Kliewer, W. M. (1967). The glucose-fructose ratio of *Vitis vinifera* grapes. Am. J. Enol. Vitic., 18, 33-41. doi:  
538 10.1016/j.aca.2011.11.043.
- 539 Kliewer, W. M. & Lider L.A. (1970). Effect of day temperature and light intensity on growth and composition of  
540 *Vitis vinifera* L. fruits. J. Amer. Soc Hortic. Sci., 95, 766–769.
- 541 Lang, A. & Thorpe M. R. (1989). Xylem, phloem and transpiration flows in a grape: application of a technique for  
542 measuring the volume of attached fruits to high resolution using Archimedes' principle. J. Exp. Bot., 40,  
543 1069–1078. doi: 10.1093/jxb/40.10.1069.
- 544 Liang, Z., Sang, M., Fan, P., Wu, B., Wang, L., Duan, W. & Li S. (2011). Changes of polyphenols, sugars, and organic  
545 acid in 5 *Vitis* genotypes during berry ripening. J. Food Sci., 76, 1231-1238.
- 546 Liu, H., Wu, B., Fan, P., Xu, H. & Li S. (2006). Sugar and acid concentrations in 98 grape cultivars analyzed by  
547 principal component analysis. J. Sci. Food Agric., 86, 1526-1536. doi: 10.1002/jsfa.2541.
- 548 Liu, H., Wu, B., Fan, P., Xu, H. & Li S. (2007). Inheritance of sugars and acids in berries of grape (*Vitis vinifera* L.).  
549 Euphytica, 153, 99-107. doi: 10.1007/s10681-006-9246-9.
- 550 Matthews, M. A., Cheng, G. & Weinbaum S. A. (1987). Changes in water potential and dermal extensibility during  
551 grape berry development. J. Amer. Soc. Hort. Sci., 112, 314-319.
- 552 Ojeda, H., Bigard, A., Escudier J. L., Samson, A., Caillé, S., Romieu, C. & Torregrosa L. (2017). De la vigne au vin :  
553 des créations variétales adaptées au changement climatique et résistant aux maladies cryptogamiques  
554 2/2 : Approche viticole pour des vins de type VDQA. Revue des Œnologues, 44, 22-27.
- 555 Ollat, N., Marguerit, E., Lecourieux, F., Destrac-Irvine, A., Barrieu, F., Dai, Z. et al. (2018). Grapevine adaptation  
556 to abiotic stresses. Acta Hort., 1248. doi: 10.17660/ActaHortic.2019.1248.68.
- 557 Parker, A. K., de Cortázar-Atauri, I. G., Gény, L., Spring, J. L., Destrac, A., Schultz H., et al. (2020). Temperature-  
558 based grapevine sugar ripeness modeling for a wide range of *Vitis vinifera* L. cultivars. Agric. For.  
559 Meteorol., 285, 107902. doi: 10.1016/j.agrformet.2020.107902.
- 560 Ramos, M. C. & Martínez de Toda F. (2021). Interannual and spatial variability of grape composition in the Rioja  
561 DOC show better resilience of cv. Graciano than cv. Tempranillo under a warming scenario. OenoOne 55,  
562 85-100. <https://doi.org/10.20870/oeno-one.2021.55.3.4695>.
- 563 R Core Team (2017). R: A Language and Environment for Statistical Computing. Vienna: R Foundation for  
564 Statistical Computing.
- 565 Rienth, M., Torregrosa, L., Luchoire, N., Chatbanyong, R., Lecourieux, D., Kelly, M., et al. (2014). Day and night  
566 heat stress trigger different transcriptomic responses in green and ripening grapevine (*Vitis vinifera*) fruit.  
567 BMC Plant Biol., 14,108. doi: 10.1186/1471-2229-14-108.
- 568 Rienth, M., Torregrosa, L., Gauthier, S., Ardisson, M., Brillouet J. L. & Romieu C. (2016). Temperature  
569 desynchronizes sugar and organic acid metabolism in ripening grapevine fruits and remodels its  
570 transcriptome. BMC Plant Biol., 16, 164. DOI 10.1186/s12870-016-0850-0.
- 571 Robin, J. P., Abbal, P. & Salmon J.M. (1997) Firmness and grape berry maturation: definition of different  
572 rheological parameters during the ripening. J. Int. Sci. Vigne Vin, 31, 127-138.  
573 <https://doi.org/10.20870/oeno-one.1997.31.3.1083>.
- 574 Rogiers, S. Y., Coetzee, Z. A., Walker, R. R., Deloire, A. & Tyerman S.D. (2017). Potassium in the grape (*Vitis vinifera*  
575 L.) berry: transport and function. Frontiers Plant Sci., 8, 1629. <https://doi.org/10.3389/fpls.2017.01629>.
- 576 Rolle, L., Giacosa, S., Gerbi, V., Bertolino, M. & Novello V. (2013). Varietal comparison of the chemical, physical,  
577 and mechanical properties of five colored table grapes. Int. J. Food Prop., 16, 598-612.  
578 <http://dx.doi.org/10.1080/10942912.2011.558231>.
- 579 Rösti, J., Schumann, M., Cleroux, M., Lorenzini, F., Zufferey, V., Rienth, M. (2018). Effect of drying on tartaric acid  
580 and malic acid in Shiraz and Merlot berries. Aust. J. Grape Wine Res., 24, 421-429. doi:  
581 10.1111/ajgw.12344.
- 582 Ruffner, H. P. (1982). Metabolism of tartaric and malic acids in *Vitis*: A review - Part A. Vitis, 21, 247–259. doi:  
583 10.5073/VITIS.1982.21.247-259.
- 584 Santillán, D., Iglesias, A., La Jeunesse, I., Garrote, L. & Sotes V. (2019). Vineyards in transition: A global assessment  
585 of the adaptation needs of grape producing regions under climate change. Science of The Total  
586 Environment, 657, 839-852. <https://doi.org/10.1016/j.scitotenv.2018.12.079>.

- 587 Savoi, S., Torregrosa, L. & Romieu C. (2021). Transcripts repressed at the stop of phloem unloading highlight the  
588 energy efficiency of sugar import in the ripening *V. vinifera* fruit. Hort. Res., 8, 193.  
589 <https://doi.org/10.1038/s41438-021-00628-6>.
- 590 Seguin, B., Stevez, L., Herbin, C. & Rochard J. (2004). Changements climatiques et perspectives pour la viticulture:  
591 conséquences potentielles d'une modification du climat. Revue des Oenologues, 111, 59-60.
- 592 Shahood, R., Rienth, M., Torregrosa, L. & Romieu C. (2015). Evolution of grapevine (*Vitis vinifera* L.) berry  
593 heterogeneity during ripening. 19th International Meeting of Viticulture GIESCO. Vol. 2, pp. 564–567.
- 594 Shahood R. (2017). The berry within an asynchronous harvest: A new paradigm towards the quantitative  
595 interpretation of sugar and acid fluxes as major osmoticums and respiratory substrates during bimodal  
596 grape development. PhD of Montpellier SupAgro, <http://www.theses.fr/s206075>, 215 p.
- 597 Shahood, R., Torregrosa, L., Savoi, S. & Romieu C. (2020). Berry development hidden by its non-synchronous  
598 population. OenoOne, 54, 1077-1092. <https://doi.org/10.20870/oeno-one.2020.54.4.3787>.
- 599 Shiraiishi, M., Fujishima, H. & Chijiwa H. (2010). Evaluation of table grape genetic resources for sugar, organic  
600 acid, and amino acid composition of berries. Euphytica, 174, 1-13. doi: 10.1007/s10681-009-0084-4.
- 601 Storey ,R. (1987). Potassium localization in the grape berry pericarp by energy-dispersive x-ray microanalysis.  
602 Am. J. Enol. Vitic., 38, 301-309.
- 603 Suter, B., Destrac-Irvine, A., Gowdy, M., Dai, Z. &van Leeuwen C. (2021) Adapting wine grape ripening to global  
604 change requires a multi-trait approach. Front. Plant Sci., 12, 624867. doi: 10.3389/fpls.2021.624867.
- 605 Sweetman, C., Sadras, V. O., Hancock, R. D., Soole, K. L., Ford, C. M. (2014). Metabolic effects of elevated  
606 temperature on organic acid degradation in ripening *Vitis vinifera* fruit. J. Exp. Bot., 65, 5975–5988. doi:  
607 10.1093/jxb/eru343.
- 608 Terrier, N., Sauvage, F. X., Ageorges, A. & Romieu C. (2001). Changes in acidity and in proton transport at the  
609 tonoplast of grape berries during development. Planta, 213, 20-28.  
610 <http://www.jstor.org/stable/23386210>.
- 611 Torregrosa, L., Bigard, A., Doligez, A. Lecourieux, D. Rienth, M., Luchaire, N., Pieri, P. Chatbanyong, R., Shahood,  
612 et al. (2017). Developmental, molecular and genetic studies on the grapevine response to temperature  
613 open breeding strategies for adaptation to warming. OenoOne, 51, 155-165. DOI: 10.20870/oeno-  
614 one.2016.0.0.1587.
- 615 Torregrosa, L., Rienth, M., Romieu, C. & Pellegrino A. (2019). The microvigne, a model for grapevine physiology  
616 studies and genetics. OenoOne, 53. DOI: <https://doi.org/10.20870/oeno-one.2019.53.3.2409>.
- 617 Varandas, S., Teixeira, M. J., Marques, J. C., Aguilar, A., Alves, A., & Bastos M. (2004). Glucose and fructose levels  
618 on grape skin: interference in *Lobesia botrana* behaviour. Analytica Chimica Acta, 513, 351-355.  
619 ,doi:10.1016/j.aca.2003.11.086.
- 620 Villette, J., Cuélar, T., Verdeil, J. L., Delrot, S. & Gaillard I. (2020). Grapevine potassium nutrition and fruit quality  
621 in the context of climate change. Front. Plant Sci., 11, 123. doi: 10.3389/fpls.2020.00123.
- 622 Vondras, A. M., Gouthu, S., Schmidt, J. A., Petersen, A. R. & Deluc, L. G. (2016). The contribution of flowering time  
623 and seed content to uneven ripening initiation among fruits within *Vitis vinifera* L. cv. Pinot noir clusters.  
624 Planta, 243, 1191-1202.
- 625 Zhang, C., Jia, H., Wu, W., Wang, X., Fang, J. & Wang C. (2015). Functional conservation analysis and expression  
626 modes of grape anthocyanin synthesis genes responsive to low temperature stress. Gene, 574, 168-177.  
627  
628  
629  
630  
631
